# Supplementary material for: Comparative Analysis of Vision Transformers and Conventional Convolutional Neural Networks in Detecting Referable Diabetic Retinopathy
Source: PubMed Central journal article supplement — Ophthalmol Sci. 2024 May 17;4(6):100552. doi: 10.1016/j.xops.2024.100552 (PMC11334703; doi:10.1016/j.xops.2024.100552), 2024-05-17
Supplement: mmc1.pdf [file mmc1.pdf]

## Supplementary Tables

**Table S2:** Demographic data of individuals in SEED external test set

|                                 | Number of individuals | Number of eyes/images |
|---------------------------------|-----------------------|-----------------------|
| Aged 60 years old and above (%) | 1,594 (55.8)          | 2,982 (54.6)          |
| Male gender (%)                 | 1,449 (50.7)          | 2,784 (51.0)          |
| Malay (%)                       | 993 (34.8)            | 1,870 (34.3)          |
| Chinese (%)                     | 577 (20.2)            | 1,118 (20.5)          |
| Indians (%)                     | 1,287 (45.0)          | 2,467 (45.2)          |

**Table S3:** Number of eyes by diabetic retinopathy severity in both training and test datasets

| Kaggle Training Dataset            |                |       |
|------------------------------------|----------------|-------|
| Non-Referable                      | Normal         | 30280 |
|                                    | Mild           | 3131  |
| Referable                          | Moderate       | 5078  |
|                                    | Severe         | 759   |
|                                    | Proliferate    | 283   |
| Kaggle Internal Validation Dataset |                |       |
| Non-Referable                      | Normal         | 803   |
|                                    | Mild           | 79    |
| Referable                          | Moderate       | 127   |
|                                    | Severe         | 22    |
|                                    | Proliferate    | 7     |
| Kaggle Internal Test Dataset       |                |       |
| Non-Referable                      | Normal         | 802   |
|                                    | Mild           | 83    |
| Referable                          | Moderate       | 132   |
|                                    | Severe         | 19    |
|                                    | Proliferate    | 9     |
| SEED Validation Dataset            |                |       |
| Non-Referable                      | No Retinopathy | 4382  |
|                                    | Minimal        | 157   |
|                                    | Mild           | 371   |
| Referable                          | Moderate       | 313   |
|                                    | Severe         | 25    |
|                                    | Proliferate    | 207   |

| Messidor-1 Validation Dataset |         |     |
|-------------------------------|---------|-----|
| Non-Referable                 | Class 0 | 546 |
|                               | Class 1 | 153 |
| Referable                     | Class 2 | 247 |
|                               | Class 3 | 254 |

**Table S5:** Performance of the models in the internal Kaggle dataset after adding 200 poor quality retinal images

| <i>Model</i>    | <i>Sensitivity analysis: internal test set (1,045 images + 200 poor quality images)</i> |                                  |
|-----------------|-----------------------------------------------------------------------------------------|----------------------------------|
|                 | AUC (%)                                                                                 | Sensitivity @ 80%<br>Specificity |
| VGG19           | 83.3                                                                                    | 72.8                             |
| ResNet50        | 88.5                                                                                    | 82.3                             |
| DenseNet201     | 89.1                                                                                    | 77.6                             |
| InceptionV3     | 87.2                                                                                    | 79.5                             |
| EfficientNetV25 | 87.0                                                                                    | 80.0                             |
| VAN_Small       | 88.3                                                                                    | 80.4                             |
| SWIN_Tiny       | 95.2                                                                                    | 93.3                             |
| CrossViT_Small  | 92.4                                                                                    | 89.0                             |
| ViT_Small       | 92.9                                                                                    | 85.2                             |

**Table S6:** Performance of models in detecting referable DR among eyes of individuals aged below and above 60 years old in SEED external test.

| <b>Model</b>    | Individuals aged below 60 years old | Individuals aged 60 years and above |
|-----------------|-------------------------------------|-------------------------------------|
|                 | AUC (%)                             | AUC (%)                             |
| VGG19           | 96.5                                | 91.5                                |
| ResNet50        | 95.3                                | 89.5                                |
| DenseNet201     | 96.0                                | 89.7                                |
| InceptionV3     | 95.6                                | 87.6                                |
| EfficientNetV25 | 96.4                                | 91.7                                |
| VAN_Small       | 97.6                                | 92.6                                |
| SWIN_Tiny       | 98.7                                | 95.8                                |
| CrossViT_Small  | 96.5                                | 92.8                                |
| ViT_Small       | 97.0                                | 94.0                                |

**Table S7:** Performance of models in detecting referable DR among eyes of female and male individuals in the SEED external test.

| Model           | Among female individuals | Among male individuals |
|-----------------|--------------------------|------------------------|
|                 | AUC (%)                  | AUC (%)                |
| VGG19           | 93.5                     | 94.3                   |
| ResNet50        | 92.0                     | 92.7                   |
| DenseNet201     | 92.8                     | 92.8                   |
| InceptionV3     | 92.0                     | 91.3                   |
| EfficientNetV25 | 94.0                     | 94.0                   |
| VAN_Small       | 95.1                     | 95.2                   |
| SWIN_Tiny       | 97.0                     | 97.5                   |
| CrossViT_Small  | 94.5                     | 94.4                   |
| ViT_Small       | 95.5                     | 95.5                   |

**Table S8:** Performance of models in detecting referable DR by ethnic subgroups in SEED external test.

| Model           | Among Malay individuals | Among Chinese individuals | Among Indian individuals |
|-----------------|-------------------------|---------------------------|--------------------------|
|                 | AUC (%)                 | AUC (%)                   | AUC (%)                  |
| VGG19           | 95.4                    | 88.5                      | 94.8                     |
| ResNet50        | 94.1                    | 85.6                      | 93.8                     |
| DenseNet201     | 94.8                    | 87.0                      | 93.8                     |
| InceptionV3     | 92.0                    | 89.1                      | 92.5                     |
| EfficientNetV25 | 96.2                    | 88.9                      | 94.6                     |
| VAN_Small       | 95.9                    | 91.3                      | 96.2                     |
| SWIN_Tiny       | 98.0                    | 97.5                      | 97.0                     |
| CrossViT_Small  | 97.1                    | 92.0                      | 94.7                     |
| ViT_Small       | 97.1                    | 93.9                      | 96.0                     |
